# Supplementary material for: Classification and mapping of European fuels using a hierarchical-multipurpose fuel classification system
Source: Copernicus journal article supplement (doi:10.5194/essd-2022-184), 2022-07-25
Supplement: Supplementary file [file essd-2022-184-AC1-supplement.pdf]

# Response to Anonymous Reviewer #1

Dear authors,

This work provides a hierarchical classification system of surface and canopy fuels adapted to continental conditions, covering 85 fuel types, and grouped into six major fuel categories. The final European fuel map contains 20 fuel types, obtaining a high estimated overall accuracy (88%-81%) for all mapped fuel types.

I reaffirm the words of the authors and it is the first step towards a mapping that takes into account the risk of risk throughout Europe, which can help in decision making from a prevention point of view that in years like 2022 in the Mediterranean regions a pre-season fire risk assessment is necessary.

It only remains for me to congratulate the authors since the article brings a novelty in the state of the art, it has great quality both in the content and in the presentation of the same.

To mention it, I would only detail the processing time required and the work process followed.

Response: The authors thank the reviewer for taking the time to read the manuscript and appreciate the congratulations on the work done.

Attending to the reviewer suggestion, we have detailed the process followed by modifying Figure 1 as follows. Regarding the required processing time, once the methodology is prepared, the generation of the European fuel map can be done in some days (although validation efforts would require more time).

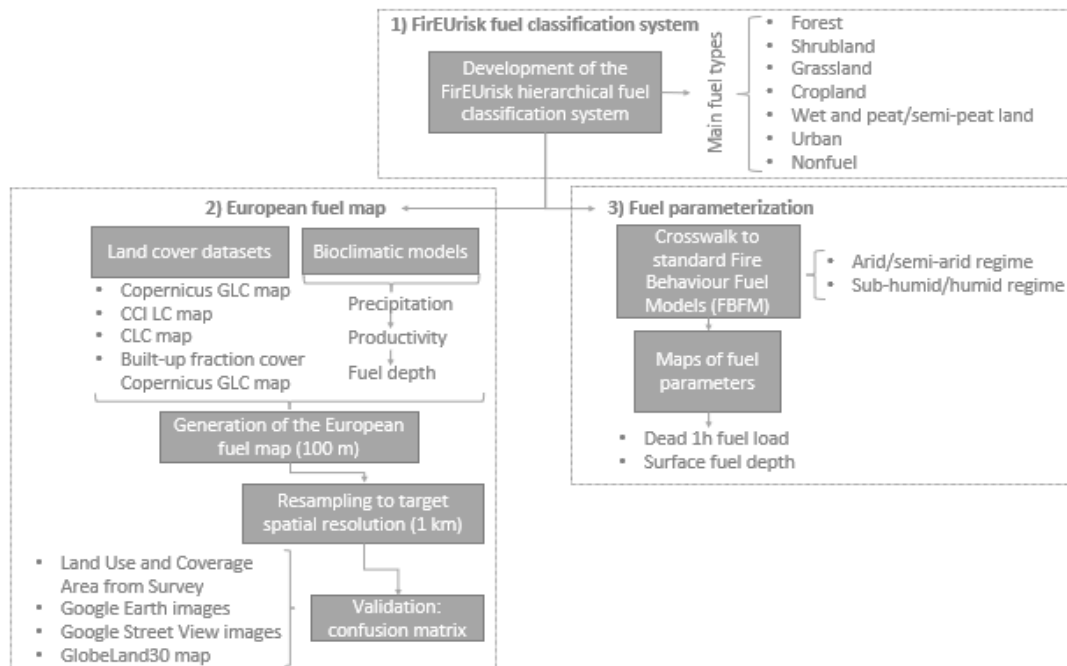

Figure 1. General overview of the structure of this work.
